# Supplementary material for: Characterisation and Antioxidant Activity of Crude Extract and Polyphenolic Rich Fractions from C. incanus Leaves
Source: PubMed Central journal article supplement (PMC5000740; doi:10.3390/ijms17081344), 2016-08-17
Supplement: ijms-17-01344-s001.pdf [file ijms-17-01344-s001.pdf]

# Supplementary Material: Characterisation and Antioxidant Activity of Crude Extract and Polyphenolic Rich Fractions from *C. incanus* Leaves

Antonella Gori, Francesco Ferrini, Maria Cristina Marzano, Massimiliano Tattini, Mauro Centritto, Maria Camilla Baratto, Rebecca Pogni and Cecilia Brunetti

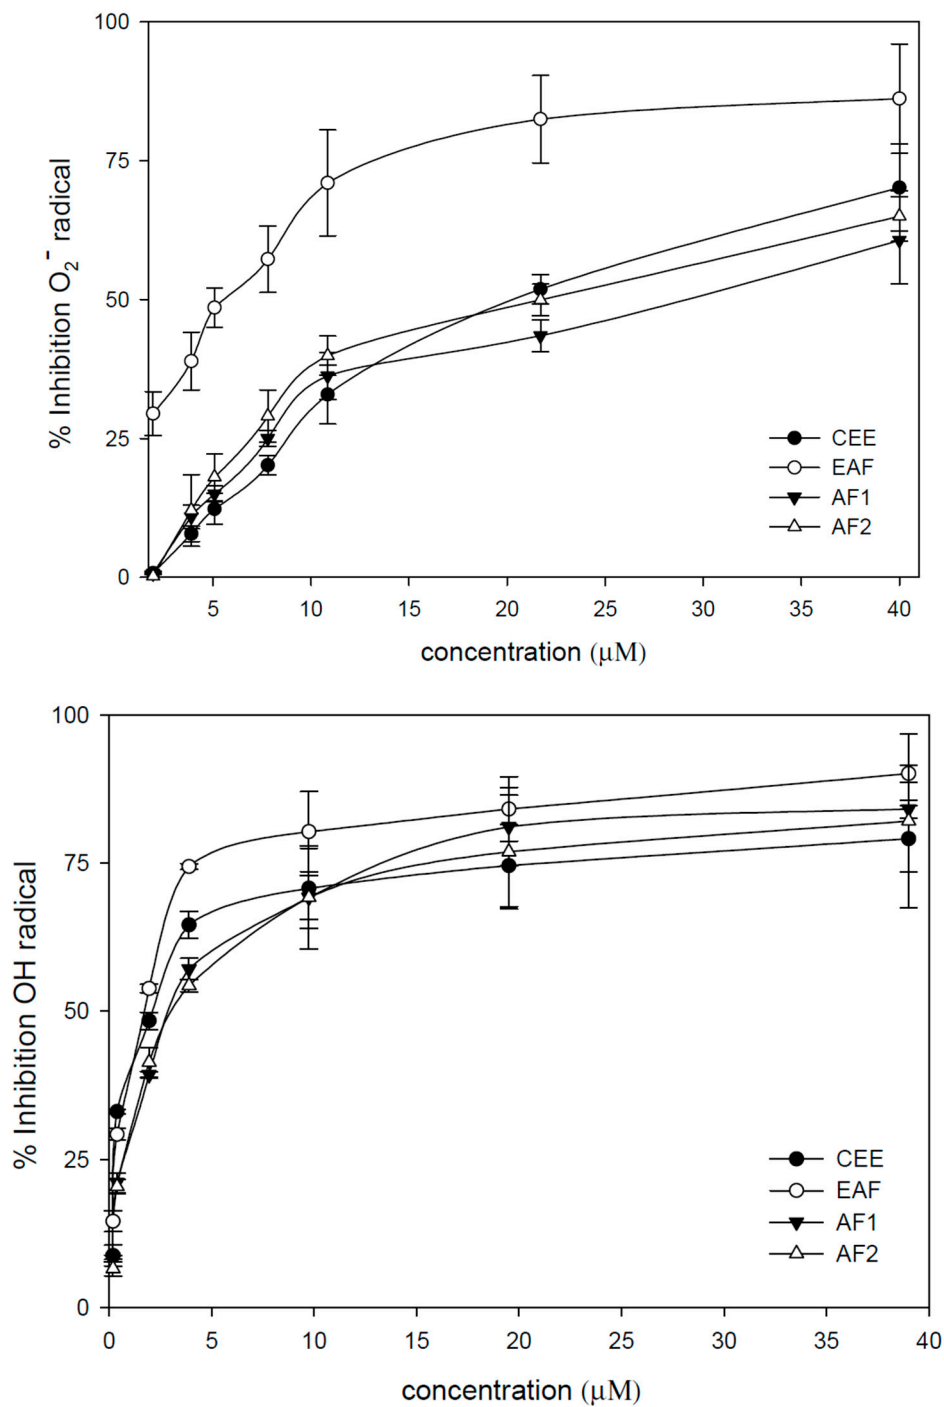

Figure S1. Cont.

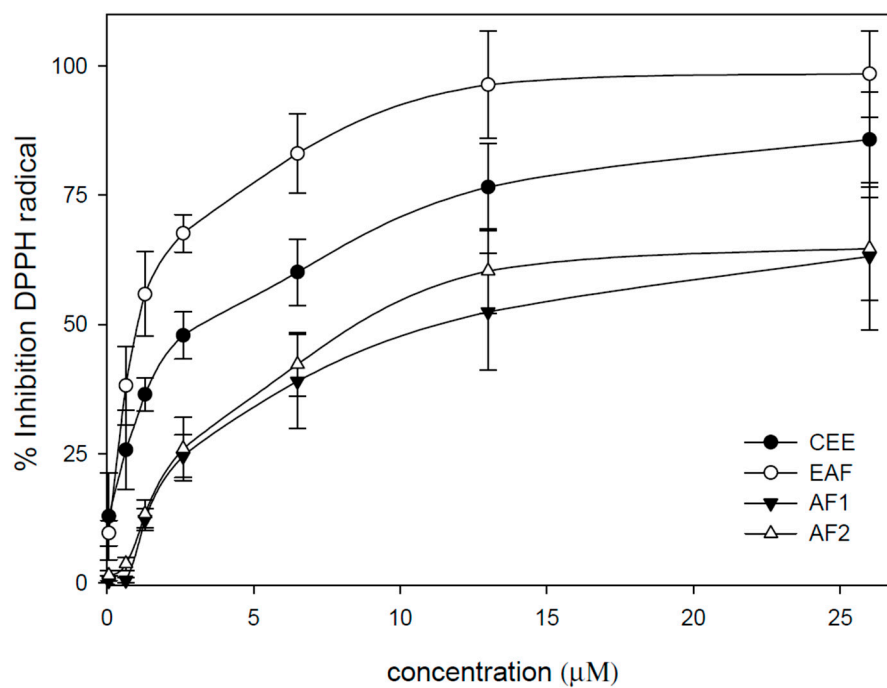

**Figure S1.** Scavenging activity (% of Inhibition) of different concentrations of CEE (crude ethanolic extract), EAF (ethyl acetate fraction), AF1 (aqueous fraction 1) and AF2 (aqueous fraction 2) of *C. incanus* leaves on superoxide anion ( $O_2^-$ ), hydroxyl (OH) and DPPH radicals. Values are the average of triplicate experiments and represented as Mean  $\pm$  Standard Deviation. DPPH, 1,1-diphenyl-2-picrylhydrazyl.
